# Supplementary material for: Guselkumab induces robust reduction in acute phase proteins and type 17 effector cytokines in active psoriatic arthritis: results from phase 3 trials
Source: PubMed Central journal article supplement — RMD Open. 2021 May 19;7(2):e001679. doi: 10.1136/rmdopen-2021-001679 (PMC8137258; doi:10.1136/rmdopen-2021-001679), 2021-05-19
Supplement: rmdopen-2021-001679supp001.pdf [file rmdopen-2021-001679supp001.pdf]

Supplementary Table 1. Biomarker results for baseline PsA population compared to healthy cohort, by study

| Log <sub>2</sub><br>expressio<br>n        | DISCOVER-1   |     |         |     |                |                   |              | DISCOVER-2 |         |     |                |                   | DISCOVER-1/2 combined |     |         |     |                |                   |
|-------------------------------------------|--------------|-----|---------|-----|----------------|-------------------|--------------|------------|---------|-----|----------------|-------------------|-----------------------|-----|---------|-----|----------------|-------------------|
|                                           | Baseline PsA |     | Healthy |     | Fold<br>change | P value           | Baseline PsA |            | Healthy |     | Fold<br>change | P value           | Baseline PsA          |     | Healthy |     | Fold<br>change | P value           |
|                                           | n=150        |     | n=34    |     |                |                   | n=150        |            | n=34    |     |                |                   | n=300                 |     | n=34    |     |                |                   |
|                                           | Mean         | SD  | Mean    | SD  | Mean           | SD                | Mean         | SD         | Mean    | SD  | Mean           | SD                | Mean                  | SD  | Mean    | SD  |                |                   |
| <b>CRP</b><br>(pg/mL)                     | 22.9         | 2.2 | 21.4    | 2.0 | <b>2.8</b>     | <b>0.0001</b>     | 23.7         | 1.9        | 21.0    | 2.3 | <b>6.2</b>     | <b>&lt;0.0001</b> | 23.3                  | 2.0 | 21.2    | 2.2 | <b>4.2</b>     | <b>&lt;0.0001</b> |
| <b>SAA</b><br>(pg/mL)                     | 22.6         | 2.4 | 21.3    | 1.5 | <b>2.6</b>     | <b>0.0026</b>     | 23.6         | 2.5        | 20.8    | 1.7 | <b>7.1</b>     | <b>&lt;0.0001</b> | 23.1                  | 2.5 | 21.0    | 1.6 | <b>4.3</b>     | <b>&lt;0.0001</b> |
| <b>IL-17A</b><br>(pg/mL)                  | 0.04         | 1.4 | -1.0    | 1.1 | <b>2.0</b>     | <b>0.0001</b>     | 0.1          | 1.5        | -1.2    | 1.0 | <b>2.4</b>     | <b>&lt;0.0001</b> | 0.1                   | 1.4 | -1.1    | 1.1 | <b>2.2</b>     | <b>&lt;0.0001</b> |
| <b>IL-17F</b><br>(pg/mL)                  | 1.8          | 1.6 | 0.7     | 1.1 | <b>2.2</b>     | <b>&lt;0.0001</b> | 1.7          | 1.4        | 0.6     | 0.9 | <b>2.0</b>     | <b>0.0002</b>     | 1.8                   | 1.5 | 0.7     | 1.0 | <b>2.1</b>     | <b>&lt;0.0001</b> |
| <b>IL-22</b><br>(pg/mL)                   | 1.9          | 1.3 | 1.4     | 1.5 | 1.4            | 0.1039            | 2.1          | 1.5        | 1.7     | 1.6 | 1.3            | 0.1775            | 2.0                   | 1.4 | 1.6     | 1.5 | 1.3            | 0.0354            |
| <b>TNF<math>\alpha</math></b><br>(pg/mL)  | 1.2          | 0.8 | 0.9     | 0.7 | 1.3            | 0.0071            | 1.1          | 0.6        | 0.9     | 0.6 | 1.2            | 0.0375            | 1.2                   | 0.7 | 0.9     | 0.6 | 1.3            | 0.0008            |
| <b>IL-6</b><br>(pg/mL)                    | 1.1          | 1.6 | 0.2     | 0.8 | <b>1.8</b>     | <b>0.0023</b>     | 1.6          | 1.7        | 0.1     | 0.8 | <b>2.8</b>     | <b>&lt;0.0001</b> | 1.4                   | 1.6 | 0.2     | 0.8 | <b>2.3</b>     | <b>&lt;0.0001</b> |
| <b>IFN-<math>\gamma</math></b><br>(pg/mL) | 1.7          | 1.3 | 1.5     | 1.0 | 1.2            | 0.3483            | 2.2          | 1.3        | 1.8     | 0.9 | 1.3            | 0.1022            | 1.9                   | 1.3 | 1.6     | 0.9 | 1.2            | 0.0689            |
| <b>sICAM1</b><br>(pg/mL)                  | 18.7         | 1.0 | 18.7    | 0.3 | -1.0           | 0.9482            | 18.8         | 0.5        | 18.4    | 0.7 | 1.3            | 0.0058            | 18.7                  | 0.8 | 18.6    | 0.6 | 1.2            | 0.0573            |
| <b>sVCAM1</b><br>(pg/mL)                  | 18.9         | 0.8 | 19.1    | 0.3 | -1.1           | 0.202             | 19.0         | 0.4        | 18.9    | 0.8 | 1.1            | 0.2203            | 19.0                  | 0.6 | 19.0    | 0.6 | -1.0           | 0.9716            |
| <b>CCL2</b><br><b>(MCP-1)</b><br>(pg/mL)  | 7.9          | 0.5 | 7.9     | 0.5 | -1.1           | 0.5748            | 7.96         | 0.7        | 8.0     | 0.5 | -1.0           | 0.6418            | 7.9                   | 0.6 | 8.0     | 0.5 | -1.0           | 0.4675            |
| <b>CCL22</b><br><b>(MDC)</b><br>(pg/mL)   | 10.4         | 0.8 | 10.1    | 0.5 | 1.2            | 0.0659            | 10.3         | 0.8        | 10.2    | 0.5 | 1.0            | 0.5937            | 10.3                  | 0.8 | 10.2    | 0.5 | 1.1            | 0.0934            |

|                                                       |      |     |      |     |      |        |      |     |      |     |      |        |      |     |      |     |      |        |
|-------------------------------------------------------|------|-----|------|-----|------|--------|------|-----|------|-----|------|--------|------|-----|------|-----|------|--------|
| <b>CCL4<br/>(MIP-1<math>\beta</math>)<br/>(pg/mL)</b> | 6.7  | 0.7 | 6.5  | 0.8 | 1.1  | 0.1933 | 6.7  | 0.7 | 6.6  | 0.7 | 1.0  | 0.6757 | 6.7  | 0.7 | 6.6  | 0.8 | 1.1  | 0.2238 |
| <b>IL-8<br/>(pg/mL)</b>                               | 3.5  | 0.9 | 3.7  | 1.6 | -1.2 | 0.1947 | 3.6  | 0.8 | 3.9  | 1.6 | -1.2 | 0.1494 | 3.6  | 0.8 | 3.8  | 1.6 | -1.2 | 0.0528 |
| <b>YKL-40<br/>(pg/mL)</b>                             | 15.5 | 1.1 | 15.6 | 1.0 | -1.1 | 0.4512 | 15.6 | 1.1 | 15.8 | 1.0 | -1.1 | 0.3787 | 15.5 | 1.1 | 15.7 | 1.0 | -1.1 | 0.2476 |

Significance defined by  $p < 0.05$  and fold change  $\geq 1.4$  (shown in bold); Statistics based on generalized linear model (covariate STUDY was used for combined analysis). IL = interleukin; PsA = Psoriatic Arthritis; SD = Standard deviation.

Supplementary Table 2. Correlation between serum biomarkers at baseline (N=300)

|                       |   | CRP     | SAA     | sICAM-1 | sVCAM-1 | CCL2 (MCP-1) | CCL22 (MDC) | CCL4 (MIP-1 $\beta$ ) | IFN- $\gamma$ | IL-6    | IL-8    | TNF $\alpha$ | YKL-40  | IL-17A  | IL-17F  | IL-22   |
|-----------------------|---|---------|---------|---------|---------|--------------|-------------|-----------------------|---------------|---------|---------|--------------|---------|---------|---------|---------|
| CRP                   | r | 1       | 0.78    | 0.34    | 0.30    | 0.11         | 0.05        | 0.09                  | 0.12          | 0.56    | 0.13    | 0.18         | 0.29    | 0.22    | 0.14    | 0.16    |
|                       | p |         | <0.0001 | <0.0001 | <0.0001 | 0.05         | 0.37        | 0.10                  | 0.04          | <0.0001 | 0.03    | 0.002        | <0.0001 | <0.0001 | 0.02    | 0.01    |
| SAA                   | r | 0.78    | 1       | 0.31    | 0.23    | 0.14         | -0.10       | 0.03                  | 0.08          | 0.51    | 0.12    | 0.11         | 0.27    | 0.16    | 0.10    | 0.11    |
|                       | p | <0.0001 |         | <0.0001 | <0.0001 | 0.02         | 0.09        | 0.55                  | 0.18          | <0.0001 | 0.04    | 0.06         | <0.0001 | 0.01    | 0.10    | 0.06    |
| sICAM-1               | r | 0.34    | 0.31    | 1       | 0.61    | 0.10         | 0.24        | 0.14                  | 0.15          | 0.15    | 0.14    | 0.20         | 0.31    | 0.15    | 0.18    | 0.24    |
|                       | p | <0.0001 | <0.0001 |         | <0.0001 | 0.10         | <0.0001     | 0.02                  | 0.01          | 0.01    | 0.02    | 0.001        | <0.0001 | 0.01    | 0.002   | <0.0001 |
| sVCAM-1               | r | 0.30    | 0.23    | 0.61    | 1       | 0.03         | 0.15        | 0.09                  | 0.11          | 0.15    | 0.003   | 0.22         | 0.21    | 0.06    | 0.12    | 0.13    |
|                       | p | <0.0001 | <0.0001 | <0.0001 |         | 0.56         | 0.01        | 0.14                  | 0.07          | 0.01    | 0.96    | <0.0001      | 0.002   | 0.30    | 0.03    | 0.02    |
| CCL2 (MCP-1)          | r | 0.11    | 0.14    | 0.10    | 0.03    | 1            | 0.26        | 0.29                  | 0.25          | 0.22    | 0.39    | 0.40         | 0.22    | 0.17    | 0.11    | 0.14    |
|                       | p | 0.05    | 0.02    | 0.10    | 0.56    |              | <0.0001     | <0.0001               | <0.0001       | 0.0001  | <0.0001 | <0.0001      | 0.0001  | 0.003   | 0.07    | 0.02    |
| CCL22 (MDC)           | r | 0.05    | -0.10   | 0.24    | 0.15    | 0.26         | 1           | 0.11                  | 0.14          | -0.04   | 0.24    | 0.31         | 0.19    | 0.39    | 0.41    | 0.35    |
|                       | p | 0.37    | 0.09    | <0.0001 | 0.01    | <0.0001      |             | 0.06                  | 0.01          | 0.54    | <0.0001 | <0.0001      | 0.001   | <0.0001 | <0.0001 | <0.0001 |
| CCL4 (MIP-1 $\beta$ ) | r | 0.09    | 0.03    | 0.14    | 0.09    | 0.29         | 0.11        | 1                     | 0.01          | 0.14    | 0.10    | 0.17         | 0.12    | 0.01    | 0.02    | -0.06   |
|                       | p | 0.10    | 0.55    | 0.02    | 0.14    | <0.0001      | 0.06        |                       | 0.90          | 0.02    | 0.07    | 0.002        | 0.04    | 0.83    | 0.74    | 0.34    |
| IFN- $\gamma$         | r | 0.12    | 0.08    | 0.15    | 0.11    | 0.25         | 0.14        | 0.01                  | 1             | 0.18    | 0.25    | 0.32         | 0.18    | 0.14    | 0.05    | 0.23    |
|                       | p | 0.04    | 0.18    | 0.01    | 0.07    | <0.0001      | 0.01        | 0.90                  |               | 0.002   | <0.0001 | <0.0001      | 0.002   | 0.02    | 0.38    | <0.0001 |
| IL-6                  | r | 0.56    | 0.51    | 0.15    | 0.15    | 0.22         | -0.04       | 0.14                  | 0.18          | 1       | 0.19    | 0.27         | 0.37    | 0.16    | 0.06    | 0.11    |
|                       | p | <0.0001 | <0.0001 | 0.01    | 0.01    | 0.0001       | 0.54        | 0.02                  | 0.002         |         | 0.001   | <0.0001      | <0.0001 | 0.005   | 0.32    | 0.05    |
| IL-8                  | r | 0.13    | 0.12    | 0.14    | 0.00    | 0.39         | 0.24        | 0.10                  | 0.25          | 0.19    | 1       | 0.35         | 0.28    | 0.26    | 0.19    | 0.16    |
|                       | p | 0.03    | 0.04    | 0.02    | 0.96    | <0.0001      | <0.0001     | 0.07                  | <0.0001       | 0.00    |         | <0.0001      | <0.0001 | <0.0001 | 0.001   | 0.01    |
| TNF $\alpha$          | r | 0.18    | 0.11    | 0.20    | 0.22    | 0.40         | 0.31        | 0.17                  | 0.32          | 0.27    | 0.35    | 1            | 0.32    | 0.29    | 0.19    | 0.24    |
|                       | p | 0.002   | 0.06    | 0.001   | <0.0001 | <0.0001      | <0.0001     | 0.002                 | <0.0001       | <0.0001 | <0.0001 |              | <0.0001 | <0.0001 | 0.001   | <0.0001 |
| YKL-40                | r | 0.29    | 0.27    | 0.31    | 0.21    | 0.22         | 0.19        | 0.12                  | 0.18          | 0.37    | 0.28    | 0.32         | 1       | 0.19    | 0.10    | 0.18    |
|                       | p | <0.0001 | <0.0001 | <0.0001 | 0.0002  | 0.0001       | 0.001       | 0.04                  | 0.002         | <0.0001 | <0.0001 | <0.0001      |         | 0.001   | 0.09    | 0.002   |
| IL-17A                | r | 0.22    | 0.16    | 0.15    | 0.06    | 0.17         | 0.39        | 0.01                  | 0.14          | 0.16    | 0.26    | 0.29         | 0.19    | 1       | 0.68    | 0.47    |
|                       | p | <0.0001 | 0.01    | 0.01    | 0.30    | 0.003        | <0.0001     | 0.83                  | 0.02          | 0.005   | <0.0001 | <0.0001      | 0.001   |         | <0.0001 | <0.0001 |
| IL-17F                | r | 0.14    | 0.10    | 0.18    | 0.12    | 0.11         | 0.41        | 0.02                  | 0.05          | 0.06    | 0.19    | 0.19         | 0.10    | 0.68    | 1       | 0.55    |
|                       | p | 0.02    | 0.10    | 0.002   | 0.03    | 0.07         | <0.0001     | 0.74                  | 0.38          | 0.32    | 0.001   | 0.001        | 0.09    | <0.0001 |         | <0.0001 |
| IL-22                 | r | 0.16    | 0.11    | 0.24    | 0.13    | 0.14         | 0.35        | -0.06                 | 0.23          | 0.11    | 0.16    | 0.24         | 0.18    | 0.47    | 0.55    | 1       |
|                       | p | 0.01    | 0.06    | <0.0001 | 0.02    | 0.02         | <0.0001     | 0.34                  | <0.0001       | 0.05    | 0.01    | <0.0001      | 0.002   | <0.0001 | <0.0001 |         |

Significance defined by  $p < 0.05$  and  $r \geq 0.25$  (shown in gray).

Supplementary Table 3. Correlation between week 24 change from baseline of serum biomarkers for participants treated with guselkumab (n=201)

|                       |   | CRP     | SAA     | sICAM-1 | sVCAM-1 | CCL2 (MCP-1) | CCL22 (MDC) | CCL4 (MIP-1 $\beta$ ) | IFN- $\gamma$ | IL-6    | IL-8    | TNF $\alpha$ | YKL-40 | IL-17A  | IL-17F  | IL-22   |
|-----------------------|---|---------|---------|---------|---------|--------------|-------------|-----------------------|---------------|---------|---------|--------------|--------|---------|---------|---------|
| CRP                   | r | 1       | 0.81    | 0.48    | 0.26    | 0.05         | 0.03        | 0.06                  | 0.09          | 0.63    | 0.04    | 0.17         | 0.22   | 0.31    | 0.22    | 0.18    |
|                       | p |         | <0.0001 | <0.0001 | 0.0002  | 0.48         | 0.71        | 0.37                  | 0.22          | <0.0001 | 0.58    | 0.02         | 0.0021 | <0.0001 | 0.0014  | 0.01    |
| SAA                   | r | 0.81    | 1       | 0.43    | 0.22    | 0.02         | -0.08       | 0.12                  | 0.06          | 0.54    | 0.06    | 0.10         | 0.24   | 0.29    | 0.23    | 0.19    |
|                       | p | <0.0001 |         | <0.0001 | 0.0014  | 0.73         | 0.25        | 0.096                 | 0.39          | <0.0001 | 0.39    | 0.18         | 0.0006 | <0.0001 | 0.0013  | 0.006   |
| sICAM-1               | r | 0.48    | 0.43    | 1       | 0.67    | 0.04         | 0.20        | 0.21                  | 0.14          | 0.31    | 0.001   | 0.30         | 0.18   | 0.27    | 0.21    | 0.21    |
|                       | p | <0.0001 | <0.0001 |         | <0.0001 | 0.55         | 0.0052      | 0.0025                | 0.05          | <0.0001 | 0.99    | <0.0001      | 0.0112 | <0.0001 | 0.0033  | 0.0021  |
| sVCAM-1               | r | 0.26    | 0.22    | 0.67    | 1       | 0.11         | 0.32        | 0.24                  | 0.19          | 0.16    | 0.04    | 0.30         | 0.17   | 0.18    | 0.20    | 0.29    |
|                       | p | 0.0002  | 0.0014  | <0.0001 |         | 0.14         | <0.0001     | 0.0006                | 0.007         | 0.026   | 0.56    | <0.0001      | 0.01   | 0.01    | 0.0045  | <0.0001 |
| CCL2 (MCP-1)          | r | 0.05    | 0.02    | 0.04    | 0.11    | 1            | 0.39        | 0.41                  | 0.11          | 0.05    | 0.31    | 0.20         | 0.19   | 0.06    | 0.05    | 0.06    |
|                       | p | 0.48    | 0.73    | 0.55    | 0.14    |              | <0.0001     | <0.0001               | 0.13          | 0.50    | <0.0001 | 0.005        | 0.009  | 0.41    | 0.44    | 0.3999  |
| CCL22 (MDC)           | r | 0.03    | -0.08   | 0.20    | 0.32    | 0.39         | 1           | 0.29                  | 0.04          | 0.01    | 0.25    | 0.25         | 0.18   | 0.34    | 0.36    | 0.35    |
|                       | p | 0.71    | 0.25    | 0.005   | <0.0001 | <0.0001      |             | <0.0001               | 0.55          | 0.93    | 0.0004  | 0.0004       | 0.009  | <0.0001 | <0.0001 | <0.0001 |
| CCL4 (MIP-1 $\beta$ ) | r | 0.06    | 0.12    | 0.21    | 0.24    | 0.41         | 0.29        | 1                     | 0.20          | 0.07    | 0.17    | 0.37         | 0.21   | 0.12    | 0.06    | 0.18    |
|                       | p | 0.37    | 0.096   | 0.0025  | 0.0006  | <0.0001      | <0.0001     |                       | 0.005         | 0.34    | 0.01    | <0.0001      | 0.003  | 0.09    | 0.44    | 0.01    |
| IFN- $\gamma$         | r | 0.09    | 0.06    | 0.14    | 0.19    | 0.11         | 0.04        | 0.20                  | 1             | 0.14    | 0.12    | 0.25         | 0.02   | 0.20    | 0.18    | 0.17    |
|                       | p | 0.22    | 0.39    | 0.05    | 0.007   | 0.13         | 0.55        | 0.005                 |               | 0.04    | 0.10    | 0.0004       | 0.75   | 0.005   | 0.01    | 0.01    |
| IL-6                  | r | 0.63    | 0.54    | 0.31    | 0.16    | 0.05         | 0.01        | 0.07                  | 0.14          | 1       | 0.08    | 0.25         | 0.24   | 0.26    | 0.13    | 0.09    |
|                       | p | <0.0001 | <0.0001 | <0.0001 | 0.03    | 0.50         | 0.93        | 0.34                  | 0.04          |         | 0.28    | 0.0004       | 0.0005 | 0.0002  | 0.06    | 0.23    |
| IL-8                  | r | 0.04    | 0.06    | 0.00    | 0.04    | 0.31         | 0.25        | 0.17                  | 0.12          | 0.08    | 1       | 0.29         | 0.13   | 0.31    | 0.20    | 0.24    |
|                       | p | 0.58    | 0.39    | 0.99    | 0.56    | <0.0001      | 0.0004      | 0.01                  | 0.10          | 0.28    |         | <0.0001      | 0.07   | <0.0001 | 0.004   | 0.0006  |
| TNF $\alpha$          | r | 0.17    | 0.10    | 0.30    | 0.30    | 0.20         | 0.25        | 0.37                  | 0.25          | 0.25    | 0.29    | 1            | 0.17   | 0.23    | 0.14    | 0.20    |
|                       | p | 0.02    | 0.18    | <0.0001 | <0.0001 | 0.005        | 0.0004      | <0.0001               | 0.0004        | 0.0004  | <0.0001 |              | 0.02   | 0.001   | 0.06    | 0.005   |
| YKL-40                | r | 0.22    | 0.24    | 0.18    | 0.17    | 0.19         | 0.18        | 0.21                  | 0.02          | 0.24    | 0.13    | 0.17         | 1      | 0.22    | 0.21    | 0.14    |
|                       | p | 0.002   | 0.0006  | 0.01    | 0.01    | 0.009        | 0.009       | 0.003                 | 0.75          | 0.0005  | 0.07    | 0.02         |        | 0.001   | 0.003   | 0.04    |
| IL-17A                | r | 0.31    | 0.29    | 0.27    | 0.18    | 0.06         | 0.34        | 0.12                  | 0.20          | 0.26    | 0.31    | 0.23         | 0.22   | 1       | 0.71    | 0.45    |
|                       | p | <0.0001 | <0.0001 | <0.0001 | 0.01    | 0.41         | <0.0001     | 0.09                  | 0.005         | 0.0002  | <0.0001 | 0.001        | 0.001  |         | <0.0001 | <0.0001 |
| IL-17F                | r | 0.22    | 0.23    | 0.21    | 0.20    | 0.05         | 0.36        | 0.06                  | 0.18          | 0.13    | 0.20    | 0.14         | 0.21   | 0.71    | 1       | 0.52    |
|                       | p | 0.001   | 0.001   | 0.003   | 0.005   | 0.44         | <0.0001     | 0.44                  | 0.01          | 0.06    | 0.004   | 0.06         | 0.003  | <0.0001 |         | <0.0001 |
| IL-22                 | r | 0.18    | 0.19    | 0.22    | 0.29    | 0.06         | 0.35        | 0.18                  | 0.17          | 0.09    | 0.24    | 0.20         | 0.14   | 0.45    | 0.52    | 1       |
|                       | p | 0.01    | 0.006   | 0.002   | <0.0001 | 0.3999       | <0.0001     | 0.01                  | 0.01          | 0.23    | 0.0006  | 0.005        | 0.04   | <0.0001 | <0.0001 |         |

Significance defined by  $p < 0.05$  and  $r \geq 0.25$  (shown in gray).
